# Supplementary material for: Effectiveness of an Artificial Intelligence–Enabled Intervention for Detecting Clinical Deterioration
Source: PubMed Central journal article supplement (PMC10964159; doi:10.1001/jamainternmed.2024.0084), 2024-03-25
Supplement: jamainternmed-e240084-s001.pdf [file jamainternmed-e240084-s001.pdf]

## Supplemental Online Content

Gallo RJ, Shieh L, Smith M, et al. Effectiveness of an artificial intelligence–enabled intervention for detecting clinical deterioration. *JAMA Intern Med*. Published online March 25, 2024. doi:10.1001/jamainternmed.2024.0084

### **eMethods**

**eFigure 1.** Count of Patients Across Maximum EDI Scores

**eFigure 2.** Sensitivity of the Primary Outcome to Bandwidth Choice

**eFigure 3.** Rates of the Secondary Outcome Across EDI Scores

**eFigure 4.** Sensitivity of the Secondary Outcome to Bandwidth Choice

**eFigure 5.** Documentation of Huddle by Score

**eFigure 6.** Age (A), Elixhauser Comorbidity Index (B), and Time of Maximum EDI Score Since Admission (C) by EDI Score

**eFigure 7.** Time from First EDI Score  $\geq 65.0$  to Maximum EDI Score

**eFigure 8.** Placebo Test for the Primary Outcome

**eTable.** Admission Diagnosis Categories

This supplemental material has been provided by the authors to give readers additional information about their work.

## **eMethods**

### Description of the Intervention:

Once a patient's risk score reached 65.0, an alert was sent to the provider and nurse taking care of the patient through the application used by the hospital for clinical communications. Additionally, a best practice alert appeared within the patient's electronic chart, which included prompts to complete a structured huddle. The provider and nurse were instructed to discuss possible reasons for deterioration, with examples given of shock, arrhythmia, aspiration, mental status changes, respiratory failure, and/or other. The team was then prompted to consider specific interventions to prevent decompensation with the following examples: assess aspiration risk/swallow evaluation, new orders, goals-of-care discussion, family meeting, new consult, ICU provider consult, critical care response nurse consult, and/or other.

**eFigure 1. Count of Patients Across Maximum EDI Scores**

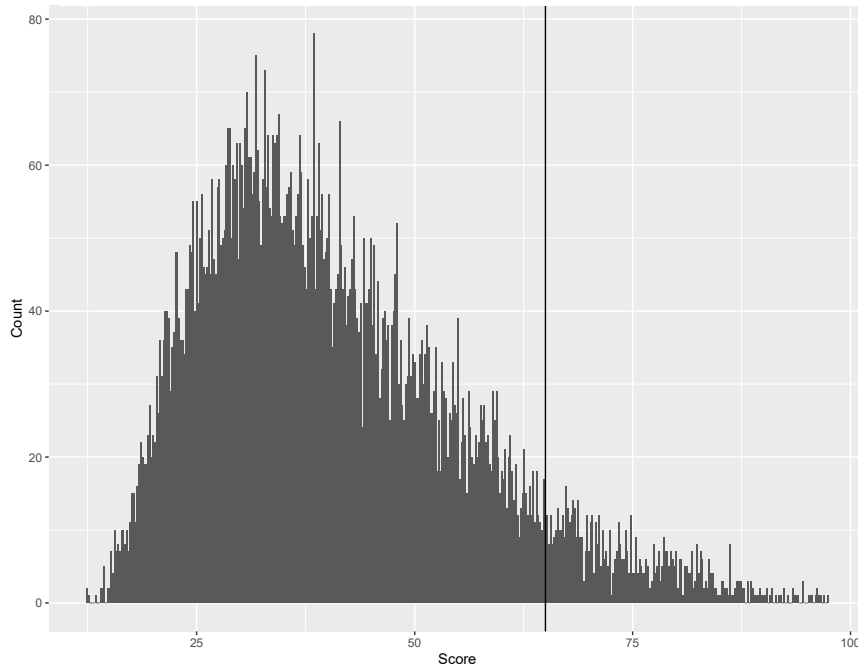

Scores are binned by 0.2 points.

**eFigure 2. Sensitivity of the Primary Outcome to Bandwidth Choice**

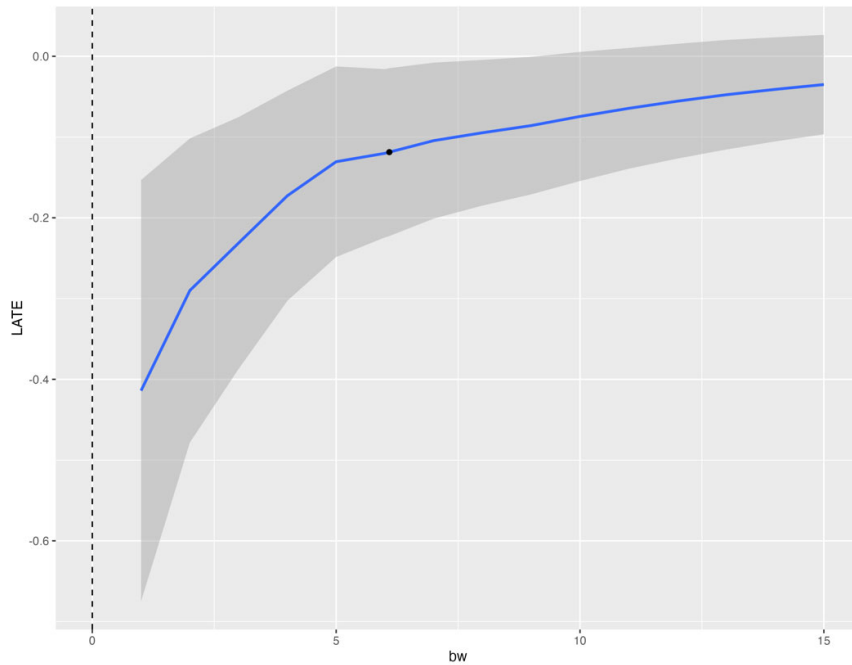

LATE: Local Average Treatment Effect; bw: bandwidth around threshold.

Blue line represents treatment effect estimate (LATE) at a given bandwidth, with gray shaded bounds indicating 95% confidence intervals. Black circle represents the CCT selected bandwidth of 6.09. The treatment effect estimate at that bandwidth was -11.9% (95% CI -22.3 to -1.5;  $p=0.03$ ).

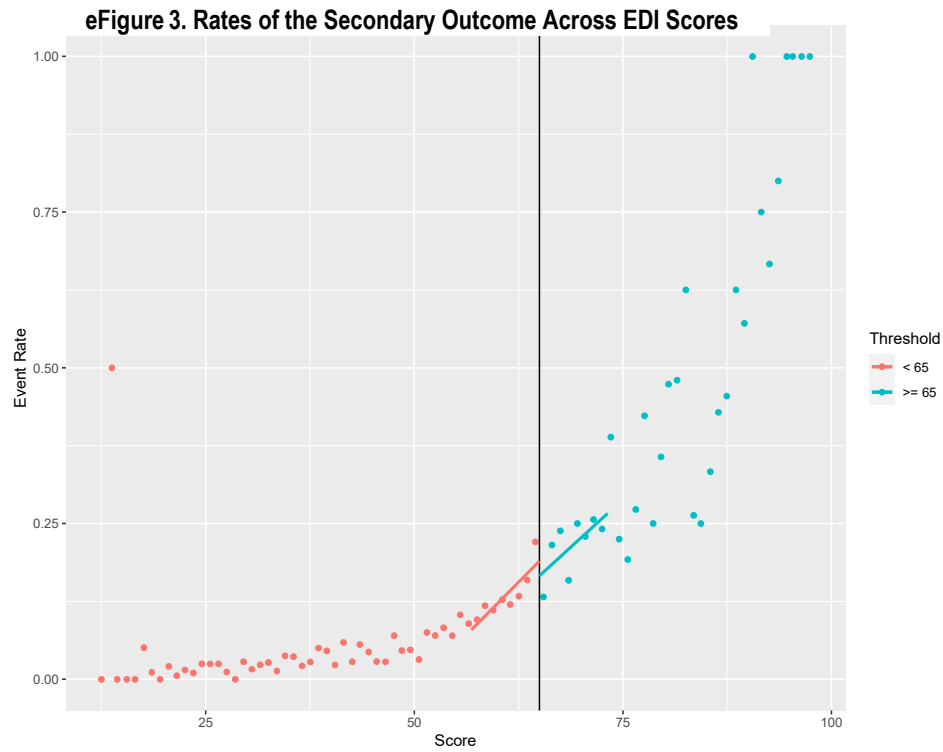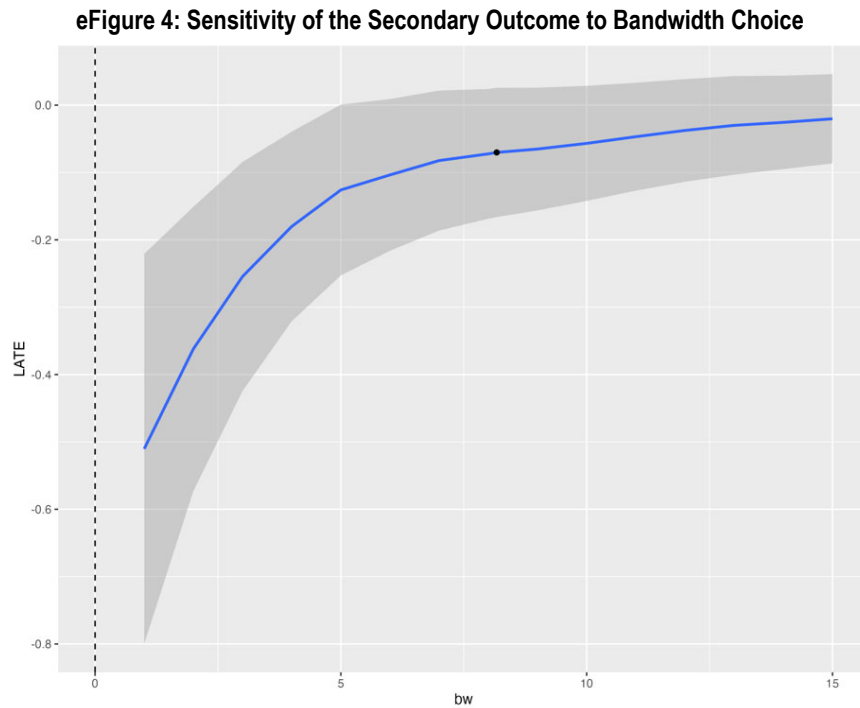

LATE: Local Average Treatment Effect; bw: bandwidth around threshold.  
 Blue line represents treatment effect estimate (LATE) at a given bandwidth, with gray shaded bounds indicating 95% confidence intervals. Black circle represents the CCT selected bandwidth of 8.17.

**eFigure 5: Documentation of Huddle by Score**

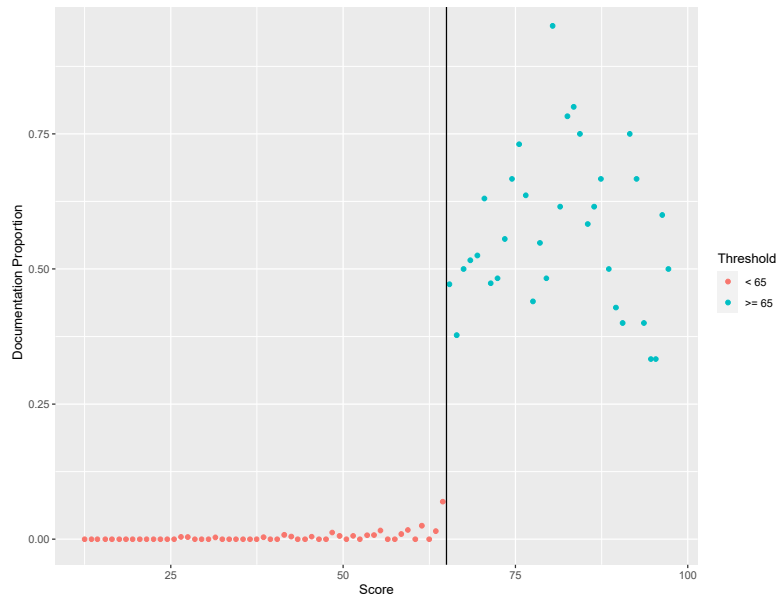

**eFigure 6: Age (A), Elixhauser Comorbidity Index (B), and Time of Maximum EDI Score Since Admission (C) by EDI Score**

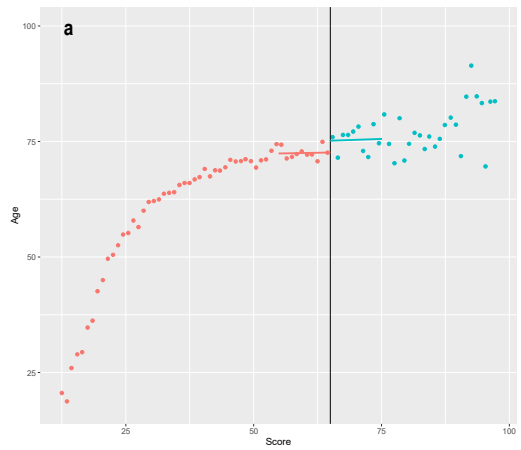

RD estimate 1.5 years; 95% CI -2.4 to 5.3, p=0.45

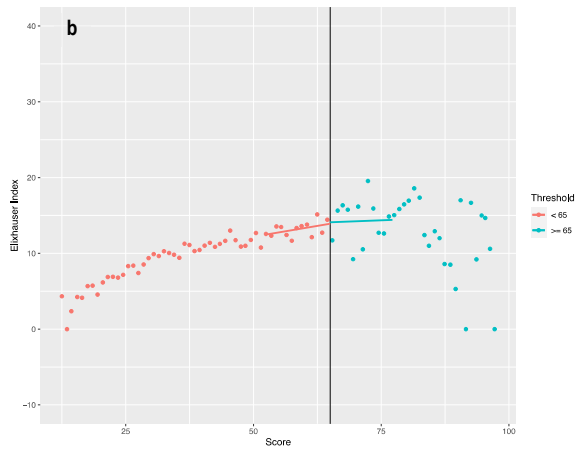

RD estimate 0.01 points; 95% CI -2.8 to 2.8, p=0.99

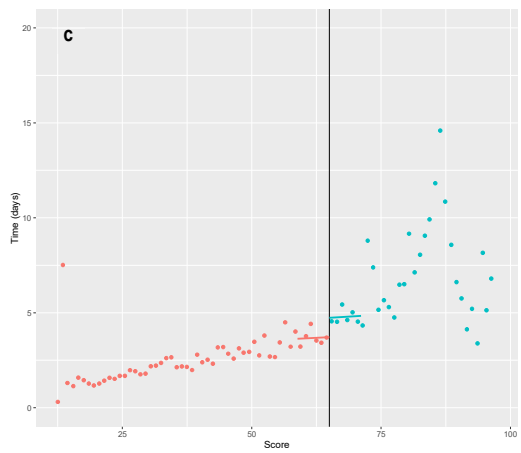

RD estimate 1.2 days; 95% CI -0.7 to 3.1, p=0.20

**eFigure 7: Time from First EDI Score  $\geq 65.0$  to Maximum EDI Score**

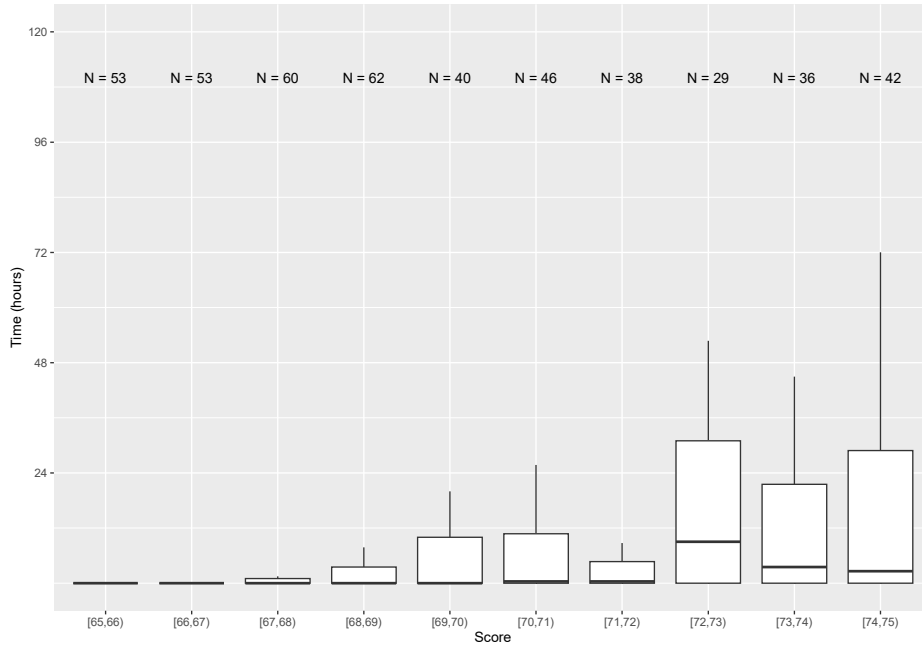

Boxplot showing time from first score  $\geq 65$  to maximum risk score by maximum risk score. Bold horizontal line represents the median, edges of the box represent interquartile range (IQR), and vertical lines represent the furthest data point within  $1.5 \times \text{IQR}$  from the edges of the box.

**eFigure 8: Placebo Test for the Primary Outcome**

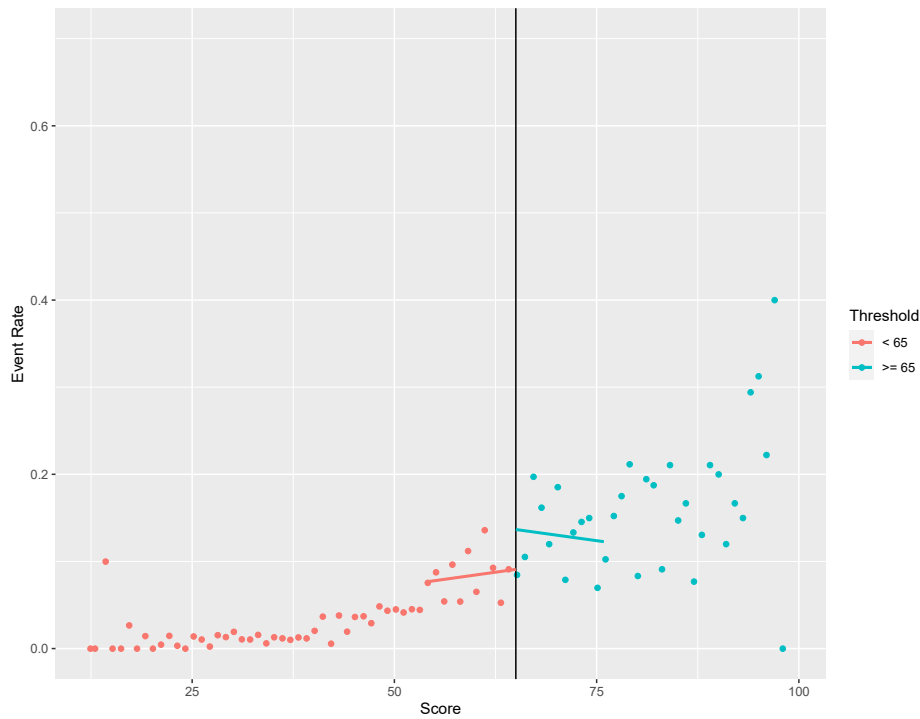

**eTable 1. Admission Diagnosis Categories**

| <b>Diagnosis Category</b> | <b>ICD-10 Codes</b>                                                                                                                                                                                                                                                                                                                                                                                                                                                                                                                                                                                                                                                                                                                                                                                                                                                                                                                                                                                                                                                                                                                                                                                                                                                                                                                                                                                                                                                                                                                      |
|---------------------------|------------------------------------------------------------------------------------------------------------------------------------------------------------------------------------------------------------------------------------------------------------------------------------------------------------------------------------------------------------------------------------------------------------------------------------------------------------------------------------------------------------------------------------------------------------------------------------------------------------------------------------------------------------------------------------------------------------------------------------------------------------------------------------------------------------------------------------------------------------------------------------------------------------------------------------------------------------------------------------------------------------------------------------------------------------------------------------------------------------------------------------------------------------------------------------------------------------------------------------------------------------------------------------------------------------------------------------------------------------------------------------------------------------------------------------------------------------------------------------------------------------------------------------------|
| Infection                 | A400, A401, A403, A408, A409, A4101, A4102, A411, A412, A413, A414, A4150, A4151, A4152, A4153, A4159, A4181, A4189, A419, R509, R7881, J1282, U071, U099, A0225, N10, N110, N111, N118, N119, N12, N136, N151, N3000, N3001, N3010, N3011, N3020, N3021, N3030, N3031, N3080, N3081, N3090, N3091, N340, N341, N342, N343, N390, T83510A, T83511A, T83512A, T83518A, T8351XA, T83592A, T83593A, T83598A, T8359XA, J13, J14, J150, J151, J1520, J15211, J15212, J1529, J153, J154, J155, J156, J157, J158, J159, J160, J168, J17, J180, J181, J188, J189, A46, L0390, L0291, L03011, L03012, L03019, L03031, L03032, L03039, L03111, L03112, L03113, L03114, L03115, L03116, L03119, L03211, L03213, L03221, L03311, L03312, L03313, L03314, L03315, L03316, L03317, L03319, L03811, L03818, L0889, L089, M869                                                                                                                                                                                                                                                                                                                                                                                                                                                                                                                                                                                                                                                                                                                           |
| Gastrointestinal          | G43D0, G43D1, R100, R1010, R1011, R1012, R1013, R102, R1030, R1031, R1032, R1033, R10811, R10812, R10813, R10814, R10815, R10816, R10817, R10819, R10821, R10822, R10823, R10824, R10825, R10826, R10827, R10829, R1083, R1084, R109, R12, R130, R140, R141, R142, R143, R150, R151, R152, R159, R160, R161, R162, R17, R180, R188, R1900, R1901, R1902, R1903, R1904, R1905, R1906, R1907, R1909, R1911, R1912, R1915, R192, R1930, R1931, R1932, R1933, R1934, R1935, R1936, R1937, R194, R195, R196, R197, R198, I8501, I8511, K2081, K2091, K2101, K2211, K250, K252, K254, K256, K260, K262, K264, K266, K270, K272, K274, K276, K280, K282, K284, K286, K2901, K2921, K2931, K2941, K2951, K2961, K2971, K2981, K2991, K31811, K50011, K50111, K50811, K50911, K51011, K51211, K51311, K51411, K51511, K51811, K51911, K5521, K5701, K5711, K5713, K5721, K5731, K5733, K5741, K5751, K5753, K5781, K5791, K5793, K625, K920, K921, K922, K850, K8500, K8501, K8502, K851, K8510, K8511, K8512, K852, K8520, K8521, K8522, K853, K8530, K8531, K8532, K858, K8580, K8581, K8582, K859, K8590, K8591, K8592, K7030, K7031, K7040, K7041, K7200, K7201, K7210, K7211, K7290, K7291, K9182, K7682, K7460, R7401, K3184, R112, K56609, K529                                                                                                                                                                                                                                                                                            |
| Cardiovascular            | R001, R000, I110, I130, I132, I501, I5020, I5021, I5022, I5023, I5030, I5031, I5032, I5033, I5040, I5041, I5042, I5043, I50810, I50811, I50812, I50813, I50814, I5082, I5083, I5084, I5089, I509, I2101, I2102, I2109, I2111, I2119, I2121, I2129, I213, I214, I219, I21A1, I21A9, I220, I221, I222, I228, I229, I200, I202, I240, I249, I25110, I25112, I25700, I25702, I25710, I25712, I25720, I25722, R072, R0789, R079, G9001, R55, I950, I951, I952, I953, I9581, I9589, I959, I470, I471, I472, I4720, I4721, I4729, I479, I480, I481, I4811, I4819, I482, I4820, I4821, I483, I484, I4891, I4892, I491, I492, I493, I4940, I4949, I495, I498, I499, G43601, G43609, G43611, G43619, I6300, I63011, I63012, I63013, I63019, I6302, I63031, I63032, I63033, I63039, I6309, I6310, I63111, I63112, I63113, I63119, I6312, I63131, I63132, I63133, I63139, I6319, I6320, I63211, I63212, I63213, I63219, I6322, I63231, I63232, I63233, I63239, I6329, I6330, I63311, I63312, I63313, I63319, I63321, I63322, I63323, I63329, I63331, I63332, I63333, I63339, I63341, I63342, I63343, I63349, I6339, I6340, I63411, I63412, I63413, I63419, I63421, I63422, I63423, I63429, I63431, I63432, I63433, I63439, I63441, I63442, I63443, I63449, I6349, I6350, I63511, I63512, I63513, I63519, I63521, I63522, I63523, I63529, I63531, I63532, I63533, I63539, I63541, I63542, I63543, I63549, I6359, I636, I638, I6381, I6389, I639, G450, G451, G452, G453, G458, G459, I2602, I2609, I2692, I2693, I2694, I2699, I160, I161, I169, I674 |
| Respiratory               | J410, J411, J418, J42, J430, J431, J432, J438, J439, J440, J441, J449, J470, J471, J479, J80, J95821, J95822, J9600, J9601, J9602, J9610, J9611, J9612, J9620, J9621, J9622, J9690, J9691, J9692, R092, J810, R0902, R0609, J690, J691, J698, R0600, J90, R0602, R0603, J4520, J4521, J4522, J4530, J4531, J4532, J4540, J4541, J4542, J4550, J4551, J4552, J45901, J45902, J45909, J45990, J45991, J45998, J8281, J8282, J8283, J8410, J84111, J84112, J84113, J84114, J84115, J84116, J84117, J8417, J84170, J84178, J8489, J849                                                                                                                                                                                                                                                                                                                                                                                                                                                                                                                                                                                                                                                                                                                                                                                                                                                                                                                                                                                                       |
| Malignancy                | C00-C96, D00-D49                                                                                                                                                                                                                                                                                                                                                                                                                                                                                                                                                                                                                                                                                                                                                                                                                                                                                                                                                                                                                                                                                                                                                                                                                                                                                                                                                                                                                                                                                                                         |
